# Supplementary material for: Zn–Y dual atomic site catalyst featuring metal–metal interactions as a nanozyme with peroxidase-like activity
Source: Royal Society of Chemistry journal article supplement (doi:10.1039/d2ta08542a), 2022-12-28
Supplement: d2ta08542a1.pdf [file d2ta08542a1.pdf]

## Supporting Information for

# Zn-Y dual atomic sites catalyst featuring metal-metal interactions as a nanozyme with peroxidase-like activity

Xiangyuan Jin,<sup>1+</sup> Xiaowei Feng,<sup>1+</sup> Guo Wang,<sup>1\*</sup> Renjian Tan,<sup>2</sup> Yi Peng,<sup>3</sup> Lirong Zheng,<sup>4</sup> Wenxing  
Chen,<sup>5\*</sup> Zhengbo Chen<sup>1\*</sup>

<sup>1</sup>Department of Chemistry, Capital Normal University, Beijing 100048, China.

<sup>2</sup>Department of Chemistry, University College London, 20 Gordon Street, London WC1H0AJ, UK

<sup>3</sup>Department of Chemistry, Wayne State University, Detroit, Michigan, 48202, United States

<sup>4</sup>Institute of High Energy Physics, Chinese Academy of Sciences, Beijing 100049, China

<sup>5</sup>Energy & Catalysis Center, School of Materials Science and Engineering, Beijing Institute of  
Technology, Beijing 100081, China

E-mail: czb979216@sina.com, wxchen@bit.edu.cn, wangguo@mail.cnu.edu.cn

†These authors contribute this work equally

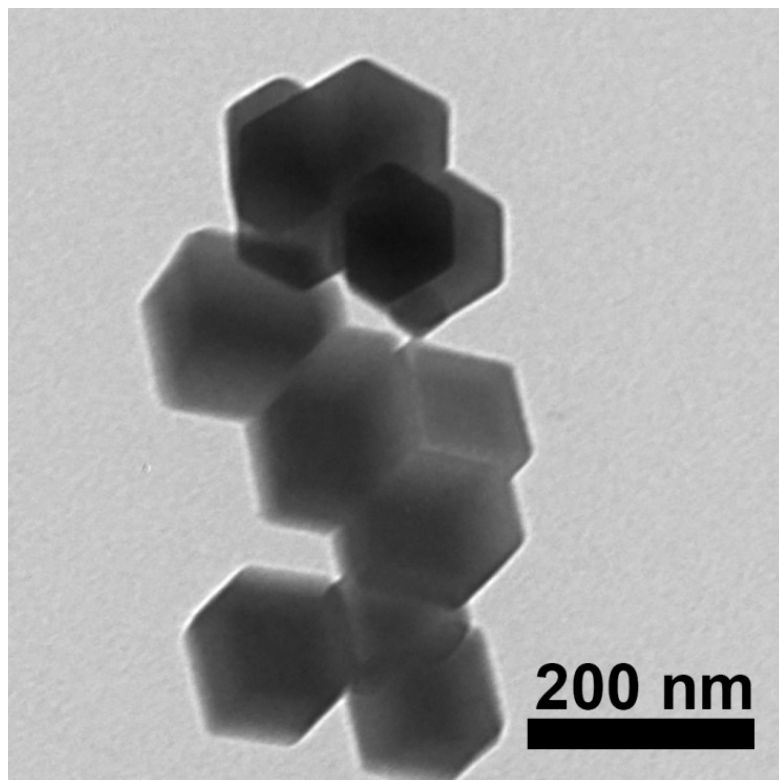

**Figure S1.** TEM image of  $Y_{0.4}@ZIF-8$ .

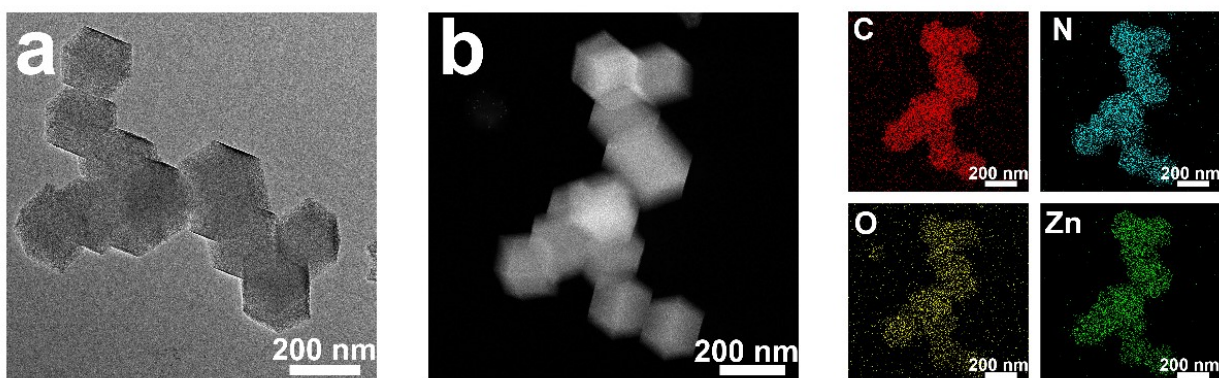

**Figure S2.** TEM images of Zn-SACs/NC and corresponding EDX Mapping images.

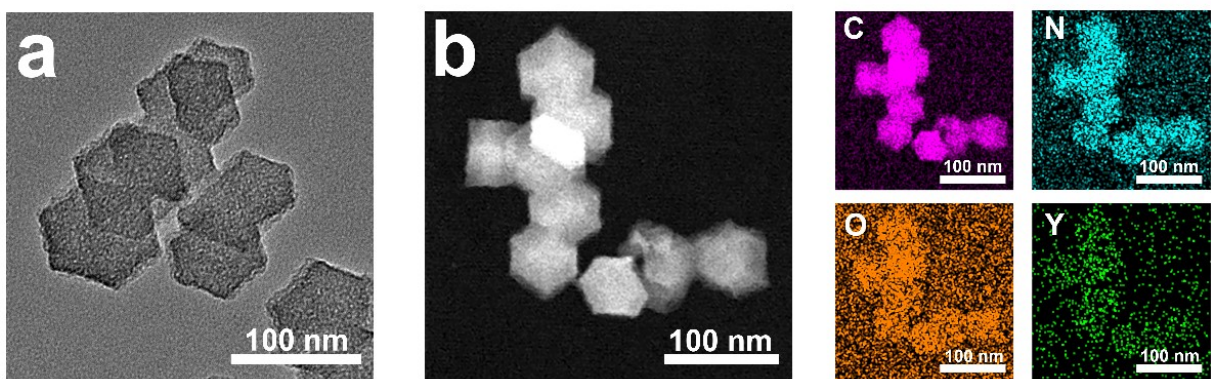

**Figure S3.** TEM images of Y-SACs/NC and corresponding EDX Mapping images.

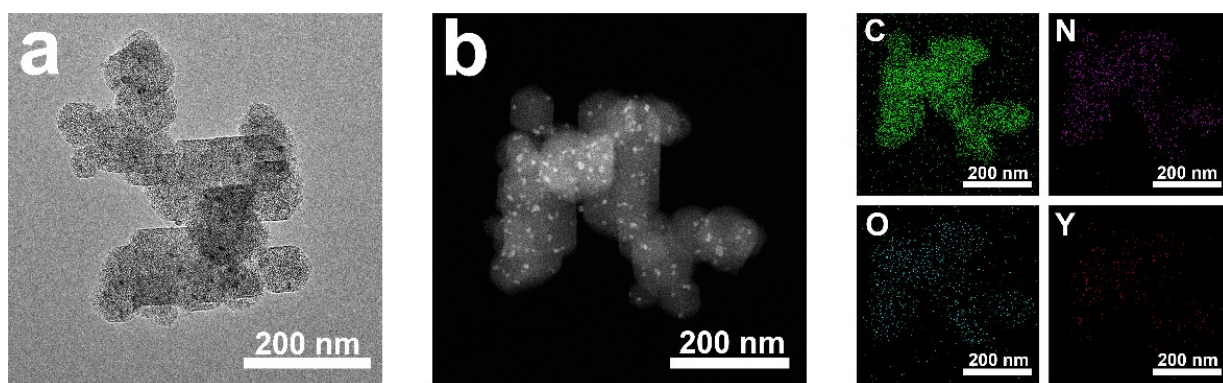

**Figure S4.** TEM images of  $Y_{0.8}$ -NC and corresponding EDX Mapping images.

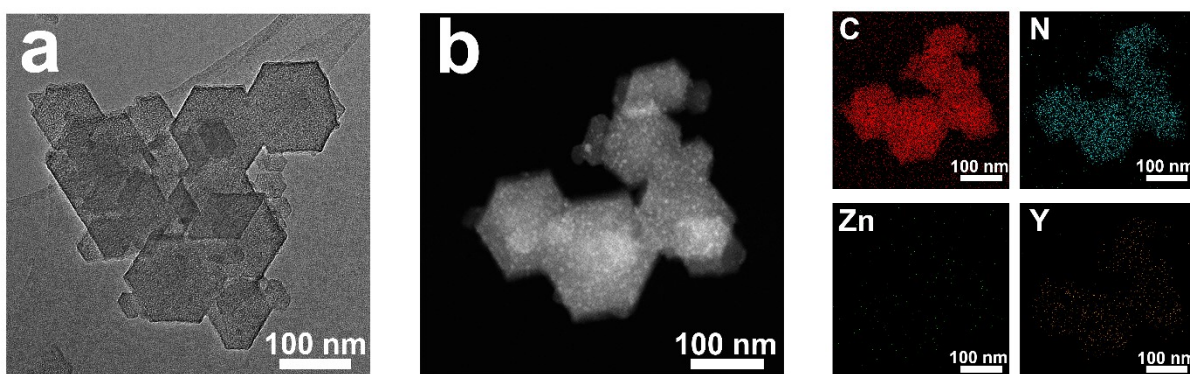

**Figure S5.** TEM images of Y<sub>1</sub>-Zn-NC and corresponding EDX Mapping images.

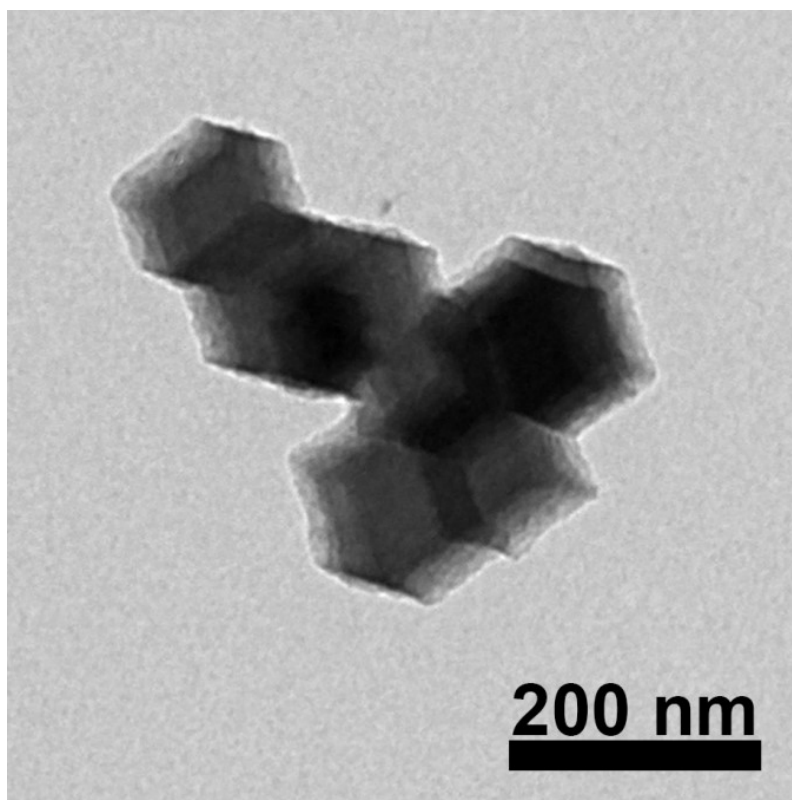

**Figure S6.** TEM images of NC.

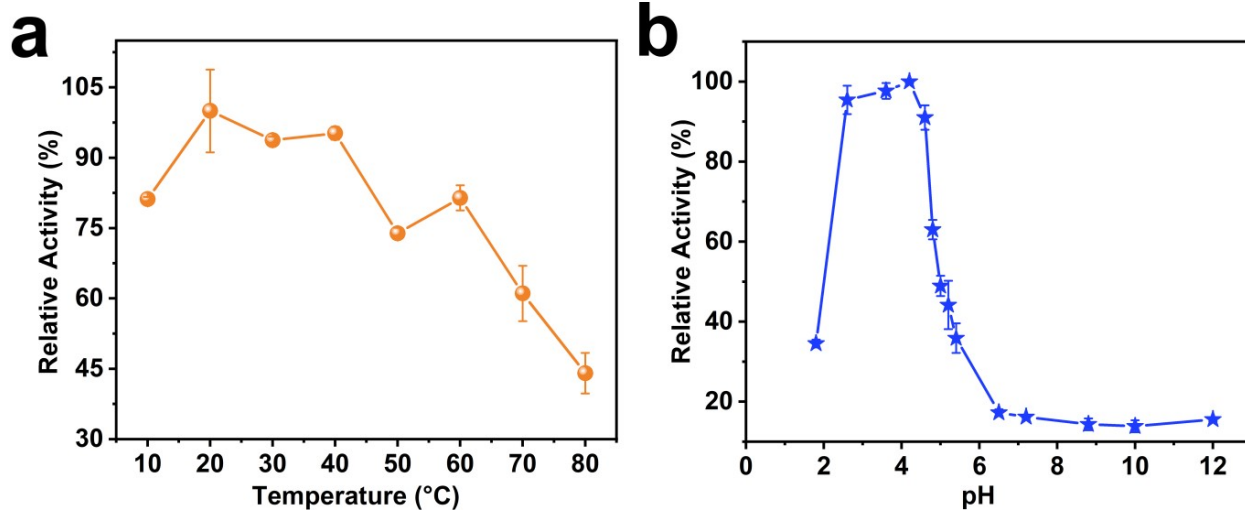

**Figure S7.** Relative activity for ZnY-DACs/NC as a function of (a) temperature and (b) pH.



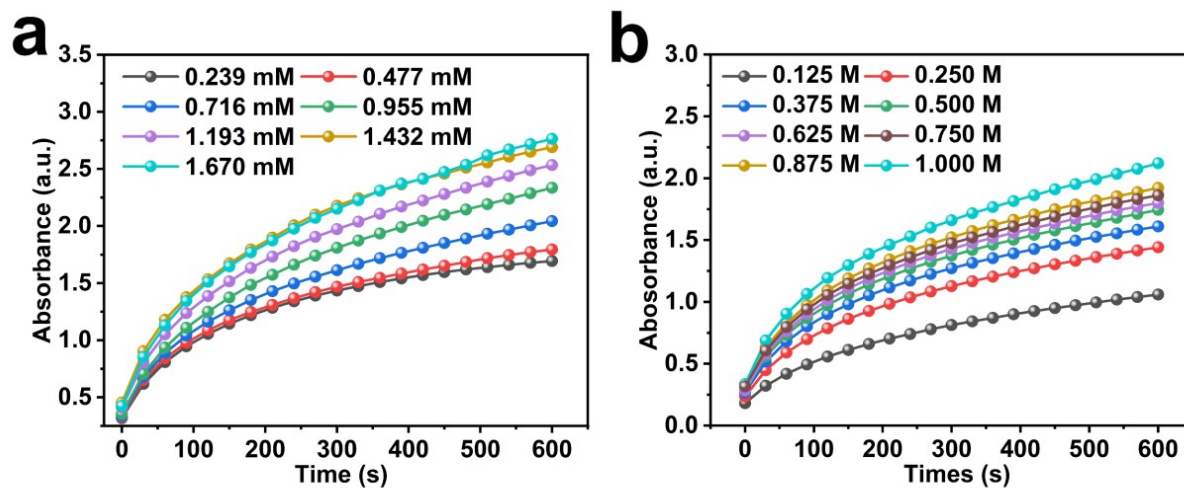

**Figure S8.** Absorbance changes as a function of time based on the oxidation of TMB by  $\text{H}_2\text{O}_2$  catalyzed by ZnY-DACs/NC by using different concentrations of TMB or  $\text{H}_2\text{O}_2$ . As the substrate (TMB or  $\text{H}_2\text{O}_2$ ) increases, the initial reaction rate accelerates.

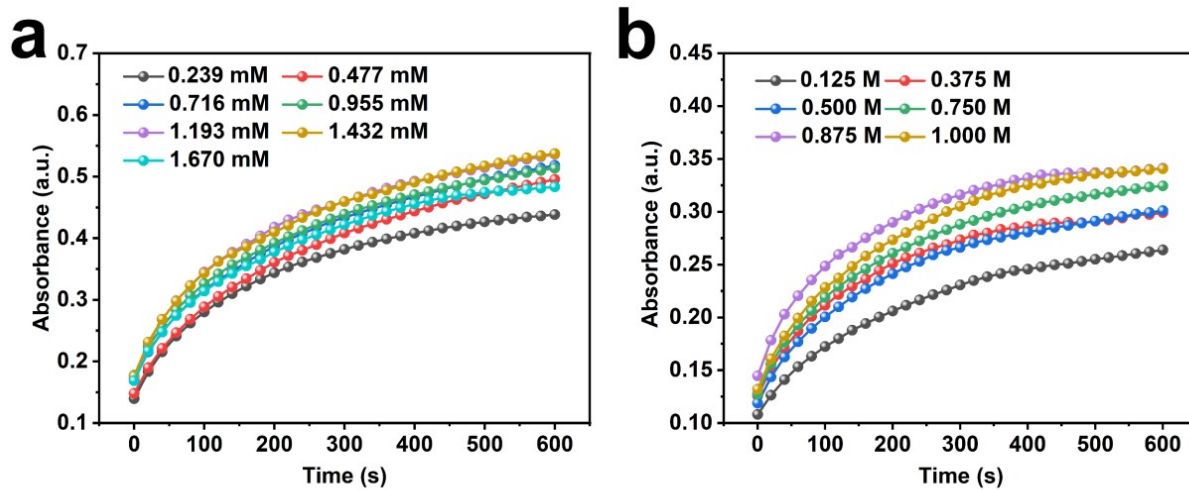

**Figure S9.** Absorbance changes as a function of time based on the oxidation of TMB by  $\text{H}_2\text{O}_2$  catalyzed by Y-SACs/NC through using different concentrations of TMB or  $\text{H}_2\text{O}_2$ . As the substrate (TMB or  $\text{H}_2\text{O}_2$ ) increases, the initial reaction rate accelerates.

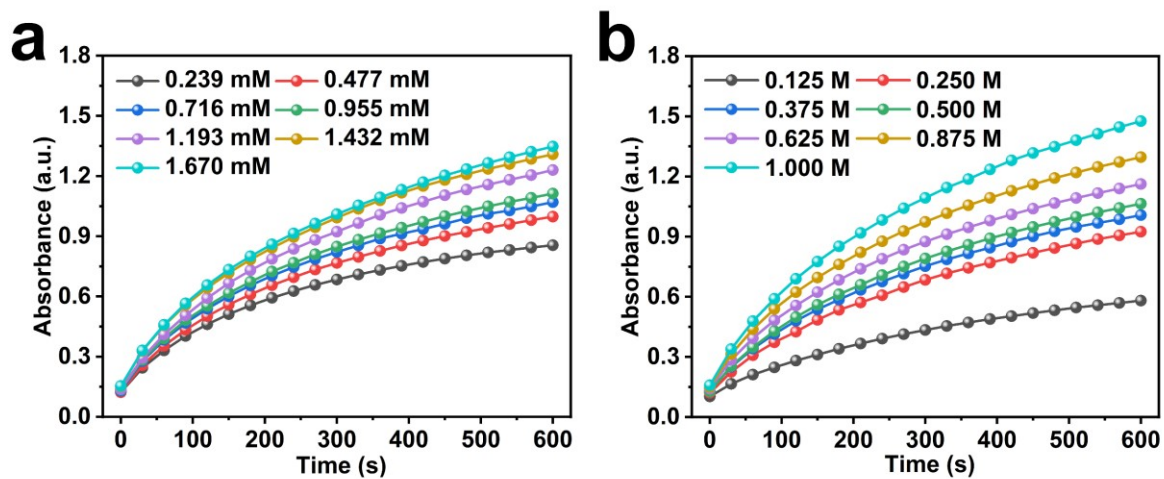

**Figure S10.** Absorbance changes as a function of time based on the oxidation of TMB by  $\text{H}_2\text{O}_2$  catalyzed by  $\text{Y}_{0.8}\text{-NC}$  through using different concentrations of TMB or  $\text{H}_2\text{O}_2$ .

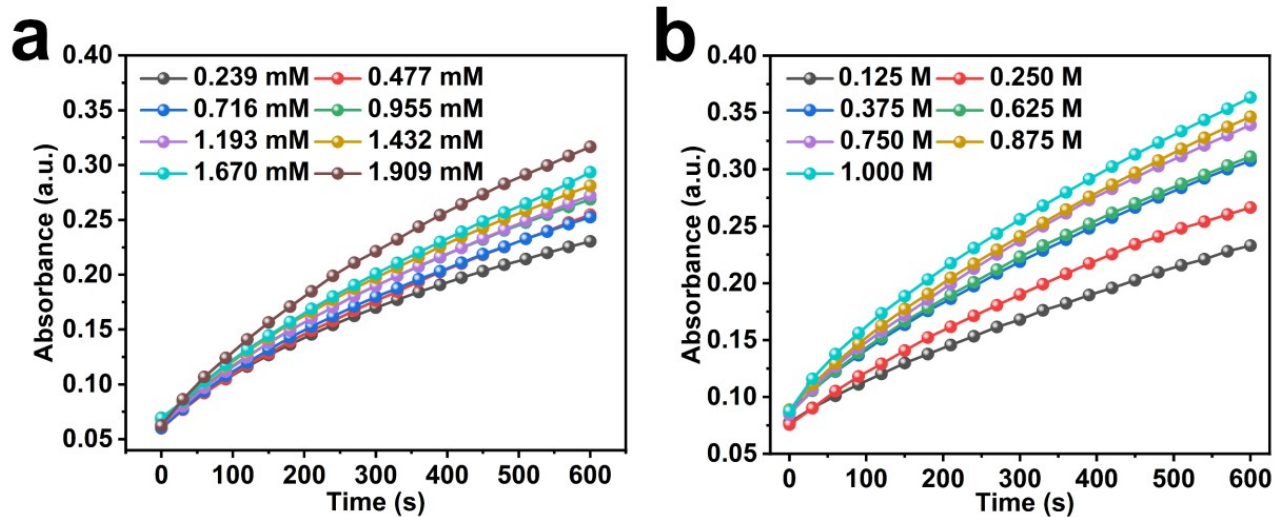

**Figure S11.** Absorbance changes as a function of time based on the oxidation of TMB by  $\text{H}_2\text{O}_2$  catalyzed by  $\text{Y}_1\text{-Zn-NC}$  through using different concentrations of TMB or  $\text{H}_2\text{O}_2$ .

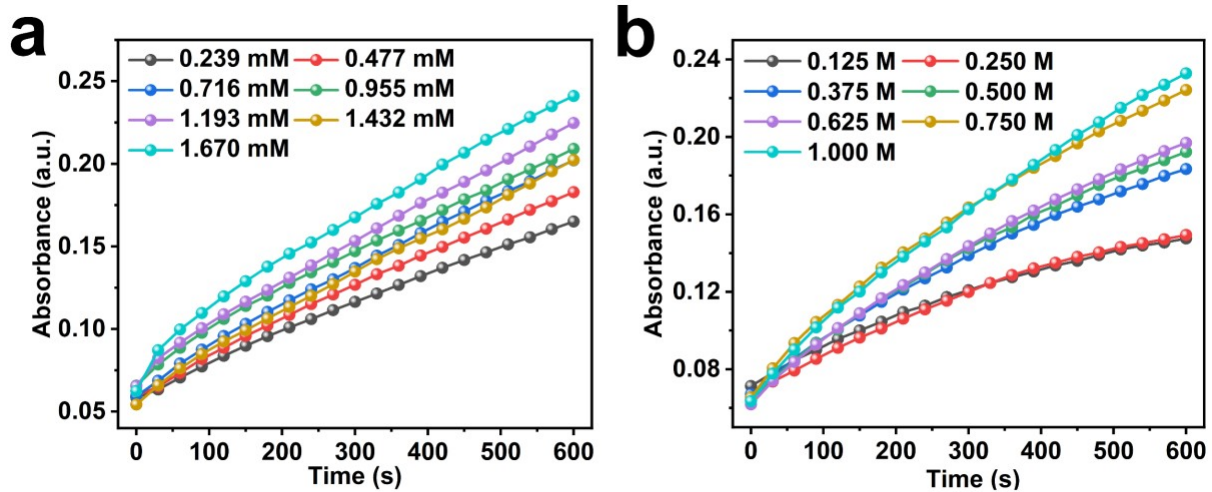

**Figure S12.** Absorbance changes as a function of time based on the oxidation of TMB by H<sub>2</sub>O<sub>2</sub> catalyzed by Zn-SACs/NC through using different concentrations of TMB or H<sub>2</sub>O<sub>2</sub>.

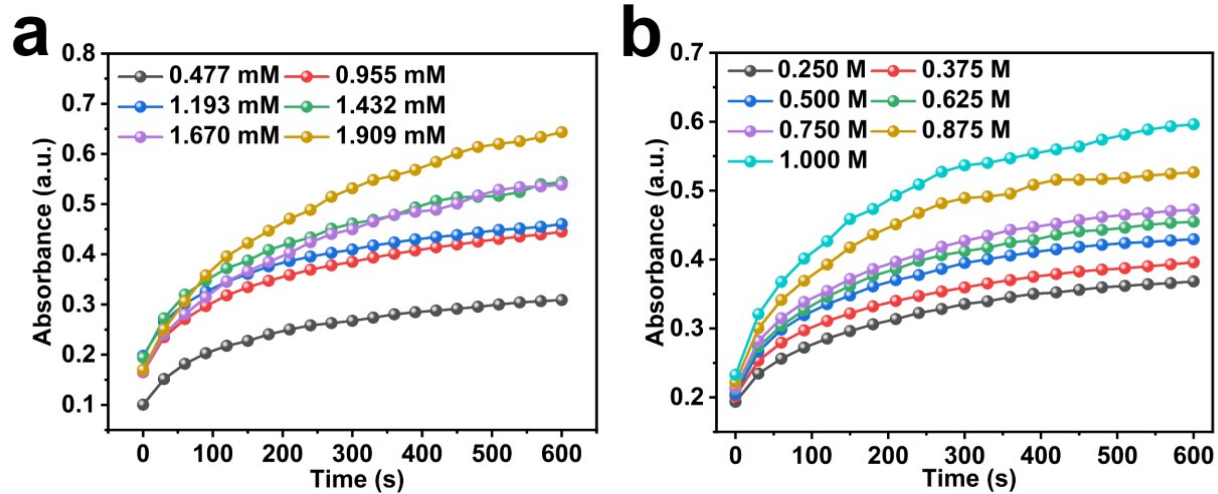

**Figure S13.** Absorbance changes as a function of time based on the oxidation of TMB by  $\text{H}_2\text{O}_2$  catalyzed by NC through using different concentrations of TMB or  $\text{H}_2\text{O}_2$ .

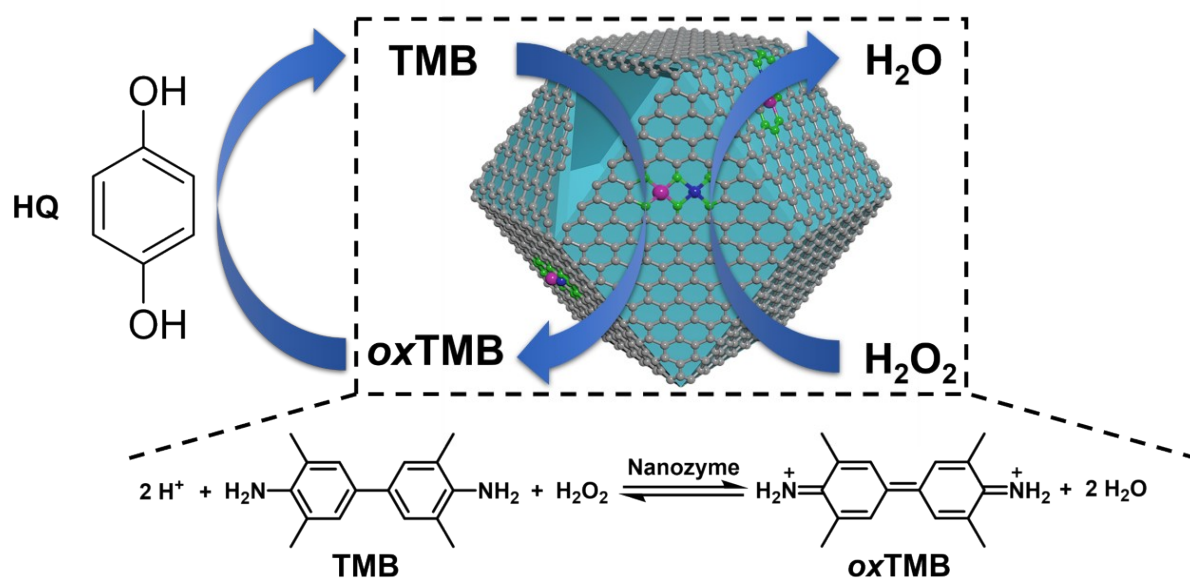

**Figure S14.** Schematic illustration of the colorimetric sensing platform for hydroquinone detection based on (ZnY-DACs/NC)-TMB-H<sub>2</sub>O<sub>2</sub> reaction system.

**Table S1.** Structural parameters extracted from the Zn and Y K-edge EXAFS fitting. ( $S_0^2=0.85$ )

| Sample             | Scattering pair | CN  | $R(\text{\AA})$ | $\sigma^2(10^{-3}\text{\AA}^2)$ | $\Delta E_0(\text{eV})$ | R factor |
|--------------------|-----------------|-----|-----------------|---------------------------------|-------------------------|----------|
| <b>ZnY-DACs/NC</b> | Zn-N            | 4.0 | 1.99            | 5.1                             | 1.0                     | 0.005    |
|                    | Zn-Y            | 1.0 | 2.59            | 5.2                             | 1.0                     |          |
| <b>Zn-SACs/NC</b>  | Zn-N            | 3.9 | 2.02            | 5.5                             | 1.0                     | 0.006    |
| <b>ZnY-DACs/NC</b> | Y-N             | 4.2 | 2.01            | 5.9                             | 1.5                     | 0.009    |
|                    | Y-Zn            | 1.1 | 2.61            | 4.6                             | 1.5                     |          |
| <b>Y-SACs/NC</b>   | Y-N             | 4.1 | 1.97            | 4.6                             | 1.5                     | 0.007    |

$S_0^2$  is the amplitude reduction factor; CN is the coordination number;  $R$  is interatomic distance (the bond length between central atoms and surrounding coordination atoms).  $\sigma^2$  is Debye-Waller factor (a measure of thermal and static disorder in absorber-scatterer distances);  $\Delta E_0$  is edge-energy shift (the difference between the zero kinetic energy value of the sample and that of the theoretical model).  $R$  factor is used to value the goodness of the fitting.

Error bounds that characterize the structural parameters obtained by EXAFS spectroscopy were estimated as  $\text{CN} \pm 20\%$ ;  $R \pm 1\%$ ;  $\sigma^2 \pm 20\%$ ;  $\Delta E_0 \pm 20\%$ .



**Table S2.**  $K_m$  and  $V_m$  values for ZnY-DAC/NC and its reference samples with TMB and H<sub>2</sub>O<sub>2</sub> as the substrates.

| Nanozyme              | TMB as the substrate |                                             | H <sub>2</sub> O <sub>2</sub> as the substrate |                                            |
|-----------------------|----------------------|---------------------------------------------|------------------------------------------------|--------------------------------------------|
|                       | $K_m$ (mM)           | $V_m(10^{-4} \text{ mM}\cdot\text{s}^{-1})$ | $K_m$ (M)                                      | $V_m(10^{-7} \text{ M}\cdot\text{s}^{-1})$ |
| ZnY-DACs/NC           | 0.1003               | 4.77                                        | 0.2640                                         | 4.69                                       |
| Y <sub>0.8</sub> -NC  | 0.1015               | 1.76                                        | 0.3873                                         | 2.51                                       |
| Y <sub>1</sub> -Zn-NC | 0.1092               | 0.167                                       | 0.1837                                         | 0.275                                      |
| Y-SACs/NC             | 0.0657               | 0.800                                       | 0.0699                                         | 0.425                                      |
| Zn-SACs/NC            | 0.4109               | 0.168                                       | 0.3091                                         | 0.156                                      |
| N-C                   | 0.5316               | 1.27                                        | 0.3837                                         | 1.34                                       |
